# Supplementary material
Source: PubMed Central journal article supplement (PMC5210022)
Supplement: NIHMS837320-supplement-eTable.pdf [file NIHMS837320-supplement-eTable.pdf]

## Supplementary Online Content

Katz MHG, Shi Q, Ahmad SA, et al. Preoperative modified FOLFIRINOX treatment followed by capecitabine-based chemoradiation for borderline resectable pancreatic cancer: Alliance for Clinical Trials in Oncology Trial A021101. *JAMA Surg*. Published online June 8, 2016.  
doi:10.1001/jamasurg.2016.1137.

**eTable.** Studies of FOLFIRINOX for borderline resectable and/or locally advanced pancreatic cancer published 2013-2015

This supplementary material has been provided by the authors to give readers additional information about their work.

**Supplemental Table. Studies of FOLFIRINOX for borderline resectable and/or locally advanced pancreatic cancer published 2013-2015**

| Study           | Type of study                | Staging system      | No. of patients by stage    | Cycles FFX, median (range) | CXRT           | No. of patients with grade 3/4 AEs N (%) | No. of patients resected <sup>a</sup> N (%) | RO <sup>b</sup> , no. of patients (%) | VR <sup>b</sup> , no. of patients (%) | OS <sup>a</sup>   |
|-----------------|------------------------------|---------------------|-----------------------------|----------------------------|----------------|------------------------------------------|---------------------------------------------|---------------------------------------|---------------------------------------|-------------------|
| Sadot [28]      | Retrospective, single center | NCCN [33]           | III, 101                    | 6 (1-20)                   | Variabl e      | 14 (14)                                  | 31 (31)                                     | 16 (52)                               | 8 (26)                                | Median OS 25 mo   |
| Christians [29] | Retrospective, single center | MCW [29]            | BLR, 18                     | 4 (3-8)                    | Variabl e      | 9 (75)*                                  | 12 (67)                                     | 12 (100)                              | 10 (83)                               | NR                |
| Mahaseth [30]   | Retrospective, single center | Not specified       | Met, 36<br>III, 20<br>II, 4 | 3 (1-10)                   | Variabl e      | 24 (40)                                  | 6 (25)                                      | 5 (83)                                | NR                                    | Median OS 17.8 mo |
| Boone [31]      | Retrospective, single center | AHPBA/SSO/SSAT [11] | Unresectable, 10<br>BLR, 11 | 5 <sup>o</sup> (1->7)      | Variabl e      | NR                                       | 9 (43)                                      | 7 (78)                                | 5 (56)                                | NR                |
| Tinchon [32]    | Retrospective, single center | AHPBA/SSO/SSAT [11] | Met, 2<br>BLR, 10           | NR                         | None           | 5 (42)                                   | 8 (80)                                      | NR                                    | 4 (40)                                | NR                |
| Current study   | Prospective, multicenter     | Intergroup [7]      | BLR, 22                     | 4                          | 50.4 Gy + cape | 14 (64)                                  | 15 (68)                                     | 14 (93)                               | 12 (80)                               | Median OS 21.7 mo |

Abbreviations: FFX, modified FOLFIRINOX; CXRT, chemoradiation; AEs, adverse events; VR, vascular resection; OS, overall survival; NCCN, National Comprehensive Cancer Network; MCW, Medical College of Wisconsin; AHPBA, American Hepatopancreatobiliary Association; SSO, Society of Surgical Oncology; SSAT, Society

for Surgery of the Alimentary Tract; BLR, borderline resectable; Met, metastatic; NR, not reported; cape, capecitabine.

<sup>a</sup>Of patients with localized disease.

<sup>b</sup>Of patients who underwent resection.

\*Of 12 patients for whom data was available.

<sup>φ</sup>Mean
